# Supplementary material for: Truncation reaction regulates the out-to-in growth mechanism to decrypt the formation of brucite-like dysprosium clusters
Source: Royal Society of Chemistry journal article supplement (doi:10.1039/d1dt03137f), 2021-11-25
Supplement: d1dt03137f1.pdf [file d1dt03137f1.pdf]

# Supporting Information

## **Truncation Reaction Regulates Out-to-In Growth Mechanism to Decrypt the Formation of Brucite-like Dysprosium Cluster**

Yun-Lan Li,<sup>a,+</sup> Hai-Ling Wang,<sup>a,+</sup> Zhong-Hong Zhu,<sup>a,c,\*</sup> Juan Li,<sup>a</sup> Hua-Hong Zou,<sup>a,\*</sup> Jin-Mei Peng,<sup>a</sup> and Fu-Pei Liang<sup>a,b,\*</sup>

<sup>a</sup>School of Chemistry and Pharmaceutical Sciences, State Key Laboratory for Chemistry and Molecular Engineering of Medicinal Resources, Guangxi Normal University, Guilin 541004, P. R. China

<sup>b</sup>Guangxi Key Laboratory of Electrochemical and Magnetochemical Functional Materials, College of Chemistry and Bioengineering, Guilin University of Technology, Guilin 541004, P. R. China

<sup>c</sup>State Key Laboratory of Luminescent Materials and Devices, School of Materials Science and Engineering, South China University of Technology, 510640 Guangzhou, P. R. China

\*E-mail (Corresponding author): 18317725515@163.com (Z.-H. Zhu), gxnuchem@foxmail.com (H.-H. Zou), fliangoffice@yahoo.com (F.-P. Liang).

## Table of Contents:

| <b>Supporting Tables</b>  |                                                                                                                                                                                                                                                 |
|---------------------------|-------------------------------------------------------------------------------------------------------------------------------------------------------------------------------------------------------------------------------------------------|
| <b>Table S1</b>           | Crystallographic data of the clusters <b>1–3</b> .                                                                                                                                                                                              |
| <b>Table S2</b>           | Selected bond lengths (Å) and angles (°) of <b>1</b> .                                                                                                                                                                                          |
| <b>Table S3</b>           | Selected bond lengths (Å) and angles (°) of <b>2</b> .                                                                                                                                                                                          |
| <b>Table S4</b>           | Selected bond lengths (Å) and angles (°) of <b>3</b> .                                                                                                                                                                                          |
| <b>Table S5</b>           | Selected parameters from the fitting result of the Cole-Cole plots for cluster <b>3</b> under 0 Oe fields.                                                                                                                                      |
| <b>Supporting Figures</b> |                                                                                                                                                                                                                                                 |
| <b>Figure S1</b>          | The crystal structure of cluster <b>1</b> (a); the coordination environment of metal centers Dy1, Dy2, Dy3, Dy8 and Dy9 in cluster <b>1</b> (b–f).                                                                                              |
| <b>Figure S2</b>          | Ligand (L <sup>1</sup> ) <sup>4+</sup> coordination mode (a); the coordination environment of metal centers Dy1–Dy3 in cluster <b>2</b> (b).                                                                                                    |
| <b>Figure S3</b>          | Cluster core of cluster <b>3</b> (a); ligand (L <sup>1</sup> ) <sup>4+</sup> coordination mode of cluster <b>3</b> (b); the coordination environment of metal centers Dy1, Dy2, Dy3, Dy5 and Dy6 in cluster <b>3</b> (c–g).                     |
| <b>Figure S4</b>          | Infrared spectra (IR) of clusters <b>1–3</b> .                                                                                                                                                                                                  |
| <b>Figure S5</b>          | TG curve of clusters <b>1–3</b> .                                                                                                                                                                                                               |
| <b>Figure S6</b>          | Powder diffraction pattern (PXRD) of clusters <b>1–3</b> .                                                                                                                                                                                      |
| <b>Figure S7</b>          | Temperature dependence of $\chi_m T$ for clusters <b>1–3</b> (a); $M$ vs. $H/T$ plots of clusters <b>1–3</b> (b, c and d).                                                                                                                      |
| <b>Figure S8</b>          | Loop curve graph of clusters <b>1–3</b> at 2 K.                                                                                                                                                                                                 |
| <b>Figure S9</b>          | Temperature-dependent $\chi'$ and $\chi''$ AC susceptibilities under 0 DC and 600 Oe fields for cluster <b>1</b> (a and b); temperature-dependent $\chi'$ and $\chi''$ AC susceptibilities under 0 DC fields for clusters <b>2–3</b> (c and d). |
| <b>Figure S10</b>         | Frequency-dependent $\chi'$ and $\chi''$ curves under zero fields for clusters <b>2</b> and <b>3</b> .                                                                                                                                          |
| <b>Figure S11</b>         | Cole–Cole plots for cluster <b>2</b> , solid lines are the best fits to the Debye model (a); $\ln(\tau)$ vs. $T^{-1}$ plots for cluster <b>2</b> , solid lines show the best fits with the Debye formula (linear) (b).                          |
| <b>Figure S12</b>         | Plots of $\ln(\chi''/\chi')$ vs. $T^{-1}$ for <b>3</b> . The solid lines represent the fitting results over the temperature range of 2–5 K.                                                                                                     |
| <b>Supporting Note</b>    |                                                                                                                                                                                                                                                 |
| <b>Note 1</b>             | Squeeze results for of clusters <b>1</b> and <b>3</b> .                                                                                                                                                                                         |

## Experimental Section

### Materials and Measurements.

All reagents were obtained from commercial sources and used without further purification. Elemental analyses for C, N and H were performed on a vario MICRO cube. Infrared spectra were recorded by transmission through KBr pellets containing *ca.* 0.5% of the complexes using a PE Spectrum FT-IR spectrometer (400–4,000  $\text{cm}^{-1}$ ; Figure S4). Thermogravimetric analyses (TGA) were conducted in a flow of nitrogen at a heating rate of 5  $^{\circ}\text{C}/\text{min}$  using a NETZSCH TG 209 F3 (Figure S5). Powder X-ray diffraction (PXRD) spectra were recorded on either a D8 Advance (Bruker) diffractometer at 293 K (Mo-K $\alpha$ ). The samples were prepared by crushing crystals and the powder placed on a grooved aluminum plate. Diffraction patterns were recorded from 5 $^{\circ}$  to 55 $^{\circ}$  at a rate of 5 $^{\circ} \text{min}^{-1}$  (Figure S6). Measurements of magnetic susceptibility were carried out within the temperature range of 2–300 K using a Quantum Design MPMS SQUID magnetometer equipped with a 5 T magnet. The diamagnetic corrections for these complexes were estimated using Pascal's constants, and magnetic data were corrected for diamagnetic contributions of the sample holder. Alternating current susceptibility measurements were performed from powdered samples to determine the in-phase and out-of-phase components of the magnetic susceptibility. The data were collected by increasing the temperature from 2 K to 15 K within frequencies ranging from 10 to 1,000 Hz. In the samples where free movement of crystallites was prevented, silicone grease was employed for embedding.

### Single-crystal X-ray crystallography.

The diffraction data of complex **1-3** were obtained by Bruker Apex-II CCD diffractometer (Cu-K $\alpha$  radiation,  $\lambda = 1.54184 \text{ \AA}$ ); XtaLAB Synergy, Dualflex, Hyix diffractometer (Mo-K $\alpha$  radiation,  $\lambda = 0.71073 \text{ \AA}$ ); Data were collected using the  $\omega$  scanning mode of XtaLAB Synergy, Dualflex, Hyix diffractometer (Cu-K $\alpha$  radiation,  $\lambda = 1.54184 \text{ \AA}$ ), respectively. The structures were solved by direct methods, followed by difference Fourier syntheses, and then refined by full-matrix least-squares techniques on  $F^2$  using *SHELXL*<sup>[1]</sup>. All other non-hydrogen atoms were refined with anisotropic thermal parameters. Hydrogen atoms were placed at calculated positions and isotropically refined using a riding model. The CCDC reference numbers are 2120830, 2091294 and 2091295 for **1-3**.

### The synthesis method.

**Synthesis of 4-diethylamino salicylaldehyde-2,2-bipyridyl-6,6-dimethylhydrazones ( $H_4L^1$ ):<sup>[2]</sup>**

2,2-bipyridyl-6,6-dimethylhydrazide (4 mmol, 1.027g) was dissolved in 100 mL of absolute methanol to which 4-diethylaminosalicylaldehyde (24 mmol, 4.732 g) was added and then refluxed at 80 °C for 12 h. The resulting yellow solid (2.32 g, 93%) was filter under vacuum, washed methanol followed by drying under reduced pressure.

**Synthesis of 1:** Add 0.05 mmol (approximately 32.1 mg) ligand  $H_4L^1$ , 0.1 mmol  $Dy(NO_3)_3 \cdot 6H_2O$  (approximately 45 mg), 0.1 mmol  $DyCl_3 \cdot 6H_2O$  (approximately 37 mg), 1.5 mL  $CH_3OH$ , 0.5 mL  $CH_3CN$  and 0.10 mL triethylamine to the Pyrex tube. In the tube, shake and sonicate for 15 min. Place the sealed Pyrex tube in an oven at 80 °C, take it out two days later, slowly cool to room temperature, and precipitate yellow lumpy crystals. The yield is about 44% (calculated with the amount of  $Dy(NO_3)_3 \cdot 6H_2O$ ). Elemental analysis theoretical value ( $C_{100}H_{153}Cl_8Dy_{16}N_{30}O_{73}$ ): C, 20.62%; H, 2.65%; N, 7.22%; experimental value: C, 20.07%; H, 2.10%; N, 6.98%. Infrared spectrum data (IR, KBr pellet,  $cm^{-1}$ ): 3435(s), 1567(s), 1510(m), 1461(m), 2982(w), 1235(w), 2929(vs), 725(w), 1130(m), 1638(s).

**Synthesis of 2:** Add 0.05 mmol (approximately 32.1 mg) ligand  $H_4L^1$ , 0.2 mmol  $DyCl_3 \cdot 6H_2O$  (approximately 76 mg), 0.1 mmol pivalic acid (approximately 10.2 mg), 1 mL  $CH_3OH$ , 1 mL  $CH_3CN$ , and 0.10 mL triethylamine to the Pyrex tube. In the tube, shake and sonicate for 15 min. Place the sealed Pyrex tube in an oven at 80 °C, take it out two days later, slowly cool to room temperature, and precipitate yellow lumpy crystals. The yield is about 45% (calculated with the amount of  $DyCl_3 \cdot 6H_2O$ ). Elemental analysis theoretical value ( $C_{100}H_{185}Cl_6Dy_6N_{20}O_{41}$ ): C, 34.27%; H, 5.32%; N, 7.99%. Experimental value: C, 33.63%; H, 5.01%; N, 7.68%. Infrared spectrum data (KBr pellet,  $cm^{-1}$ ): 3445(s), 2974(w), 2916(vs), 1610(s), 1518(s), 1473(m), 1372(m), 1334(m), 1243(m), 1133(m), 702(m), 617(m).

**Synthesis of 3:** Add 0.05 mmol (about 32.1 mg) ligand  $H_4L^1$ , 0.1 mmol  $Dy(NO_3)_3 \cdot 6H_2O$  (about 45 mg), 0.1 mmol  $DyCl_3 \cdot 6H_2O$  (approximately 38 mg), 0.1 mmol di(pyridin-2-yl)methanone (about, 18.4 mg), 1 mL  $CH_3OH$ , 1 mL  $CH_3CN$  and 0.10 mL triethylamine to the Pyrex tube. In the tube, shake and sonicate for 15 min. Place the sealed Pyrex tube in an oven at 80 °C, take it out two days later, slowly cool to room temperature, and precipitate yellow lumpy crystals. The yield is about 41% (calculated with the amount of ligand). Elementary analysis theoretical value ( $C_{66}H_{113}Cl_2Dy_7N_{20}O_{45}$ ):

C, 25.11%; H, 3.61%; N, 8.87%. Experimental value: C, 24.43%; H, 3.21%; N, 8.16%. IR data (cm<sup>-1</sup>): 3445(s), 2984(w), 2895(vs), 1586.21(s), 1379(s), 1231(m), 1059(m), 883(m), 709(w).

**Table S1.** Crystallographic data of the clusters **1–3**.

|                                                                          | <b>1</b>                                                                                           | <b>2</b>                                                                                          | <b>3</b>                                                                                         |
|--------------------------------------------------------------------------|----------------------------------------------------------------------------------------------------|---------------------------------------------------------------------------------------------------|--------------------------------------------------------------------------------------------------|
| Formula                                                                  | C <sub>100</sub> H <sub>153</sub> Cl <sub>8</sub> Dy <sub>16</sub> N <sub>30</sub> O <sub>73</sub> | C <sub>100</sub> H <sub>185</sub> Cl <sub>6</sub> Dy <sub>6</sub> N <sub>20</sub> O <sub>41</sub> | C <sub>66</sub> H <sub>113</sub> Cl <sub>2</sub> Dy <sub>7</sub> N <sub>20</sub> O <sub>45</sub> |
| Formula weight                                                           | 5823.06                                                                                            | 3504.05                                                                                           | 3156.87                                                                                          |
| <i>T</i> , K                                                             | 293(2)                                                                                             | 100.00(10)                                                                                        | 100.00(10)                                                                                       |
| Crystal system                                                           | trigonal                                                                                           | monoclinic                                                                                        | monoclinic                                                                                       |
| Space group                                                              | <i>R</i> -3 <i>c</i>                                                                               | <i>P</i> 2 <sub>1</sub> / <i>n</i>                                                                | <i>C</i> 2/ <i>c</i>                                                                             |
| <i>a</i> , Å                                                             | 31.8024(5)                                                                                         | 15.4667(3)                                                                                        | 24.1218(4)                                                                                       |
| <i>b</i> , Å                                                             | 31.8024(5)                                                                                         | 26.7576(4)                                                                                        | 19.51008(19)                                                                                     |
| <i>c</i> , Å                                                             | 32.0143(7)                                                                                         | 16.1721(4)                                                                                        | 22.0893(3)                                                                                       |
| <i>α</i> , °                                                             | 90                                                                                                 | 90                                                                                                | 90                                                                                               |
| <i>β</i> , °                                                             | 90                                                                                                 | 113.181(2)                                                                                        | 105.4542(10)                                                                                     |
| <i>γ</i> , °                                                             | 120                                                                                                | 90                                                                                                | 90                                                                                               |
| <i>V</i> , Å <sup>3</sup>                                                | 28041.1(10)                                                                                        | 6152.5(2)                                                                                         | 10019.7(2)                                                                                       |
| <i>Z</i>                                                                 | 12                                                                                                 | 1                                                                                                 | 1                                                                                                |
| <i>D</i> <sub>c</sub> , g cm <sup>-3</sup>                               | 2.226                                                                                              | 1.642                                                                                             | 1.971                                                                                            |
| <i>μ</i> , mm <sup>-1</sup>                                              | 6.43                                                                                               | 3.80                                                                                              | 28.640                                                                                           |
| <i>F</i> (000)                                                           | 15233.0                                                                                            | 2982.0                                                                                            | 5706.0                                                                                           |
| 2 <i>θ</i> range for data collection/°                                   | 4.668, 60.12                                                                                       | 4.1, 61.4                                                                                         | 6.0, 154.4                                                                                       |
| Reflns coll.                                                             | 40405                                                                                              | 53113                                                                                             | 37561                                                                                            |
| Unique reflns                                                            | 5506                                                                                               | 15438                                                                                             | 9976                                                                                             |
| <i>R</i> <sub>int</sub>                                                  | 0.0349                                                                                             | 0.0364                                                                                            | 0.0413                                                                                           |
| Observed data [ <i>I</i> > 2 <i>σ</i> ( <i>I</i> )]                      | 4671                                                                                               | 12744                                                                                             | 11525                                                                                            |
| <i>N</i> <sub>ref</sub> , <i>N</i> <sub>par</sub>                        | 5506, 344                                                                                          | 735, 1588                                                                                         | 2, 605                                                                                           |
| <i>R</i> <sub>1</sub> <sup>a</sup> ( <i>I</i> > 2 <i>σ</i> ( <i>I</i> )) | 0.0494                                                                                             | 0.0392                                                                                            | 0.0568                                                                                           |
| <i>wR</i> <sub>2</sub> <sup>b</sup> (all data)                           | 0.1474                                                                                             | 0.1233                                                                                            | 0.1523                                                                                           |
| GOF                                                                      | 1.081                                                                                              | 1.055                                                                                             | 1.016                                                                                            |

$$^aR_1 = \sum ||F_o| - |F_c|| / \sum |F_o|, \quad ^b wR_2 = [\sum w(F_o^2 - F_c^2)^2 / \sum w(F_o^2)^2]^{1/2}$$

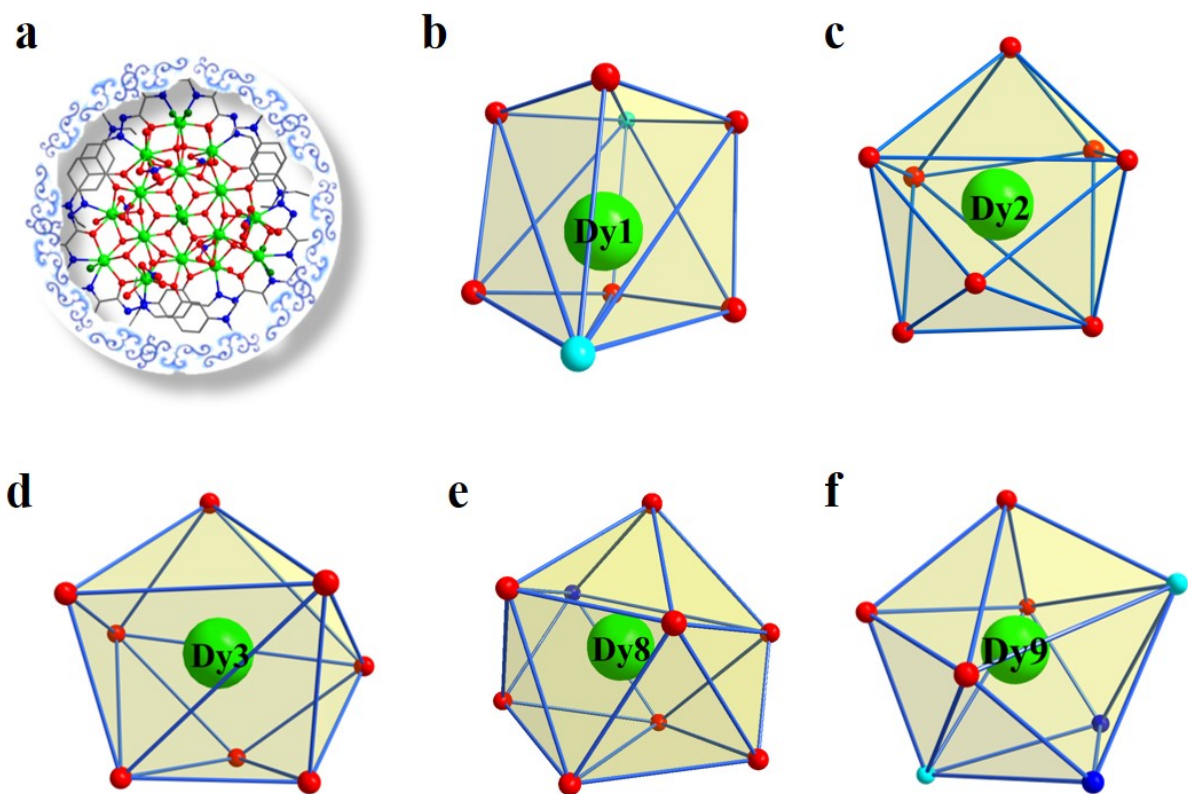

**Figure S1.** The crystal structure of cluster **1** (a); the coordination environment of metal centers Dy1, Dy2, Dy3, Dy8 and Dy9 in cluster **1** (b–f).

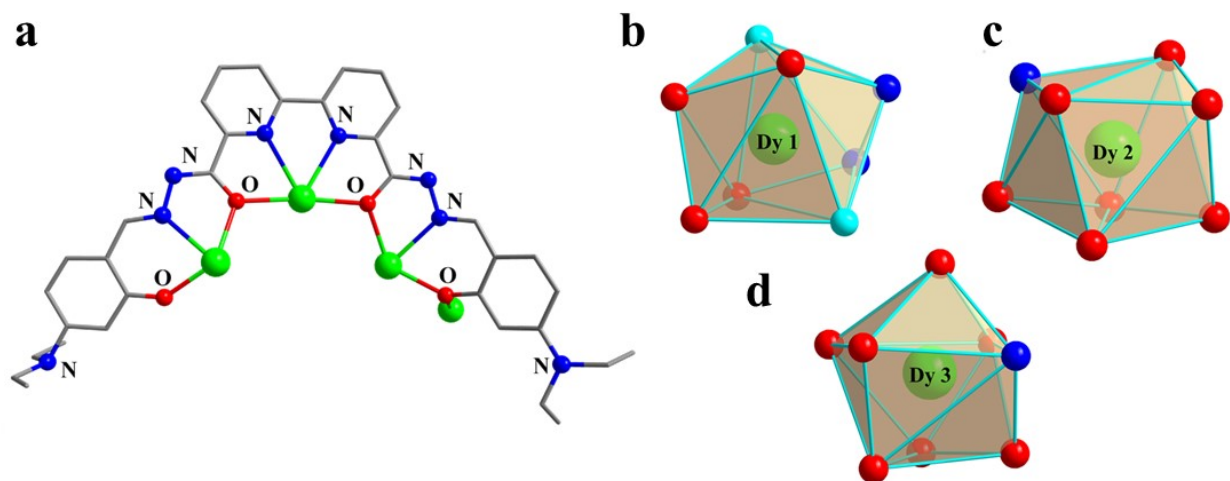

**Figure S2.** Ligand ( $L^1$ )<sup>4+</sup> coordination mode (a); the coordination environment of metal centers Dy1–Dy3 in cluster **2** (b).

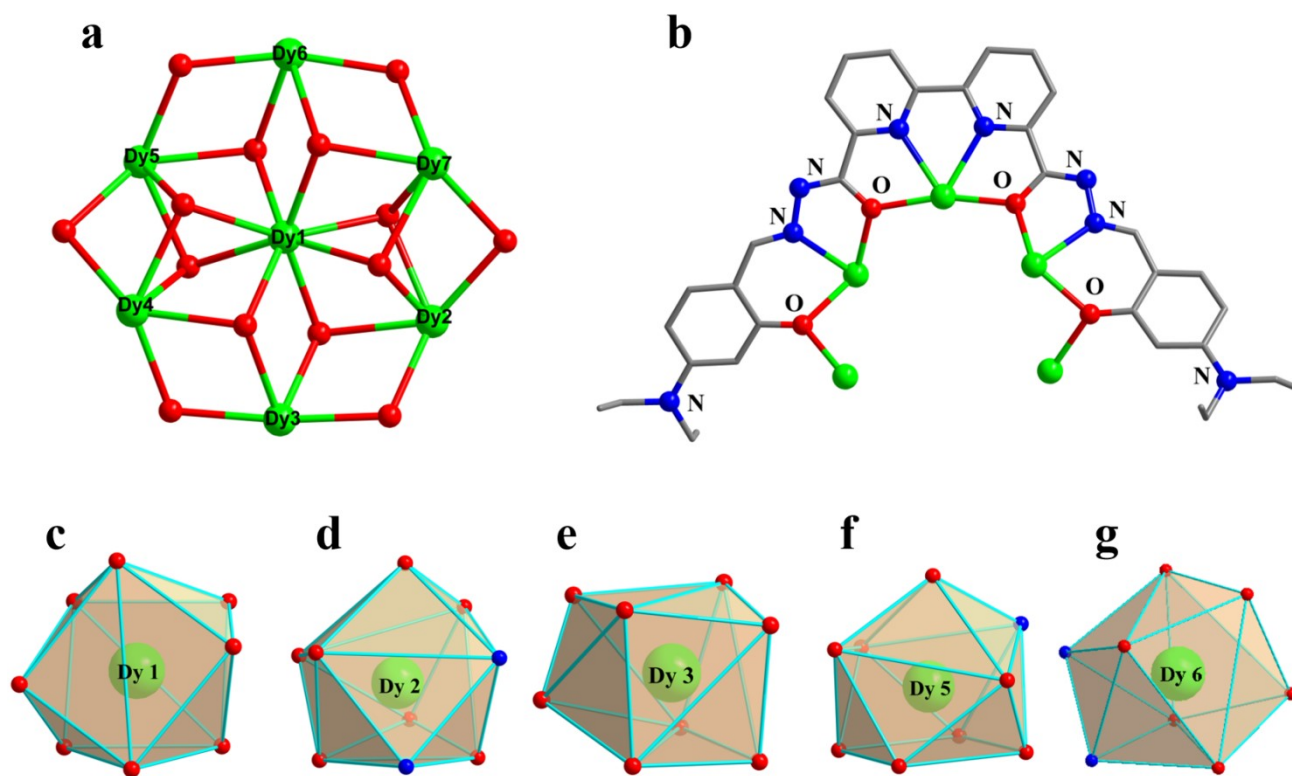

**Figure S3.** Cluster core of cluster **3** (a); ligand ( $L^1$ )<sup>4+</sup> coordination mode of cluster **3** (b); the coordination environment of metal centers Dy1, Dy2, Dy3, Dy5 and Dy6 in cluster **3** (c-g).

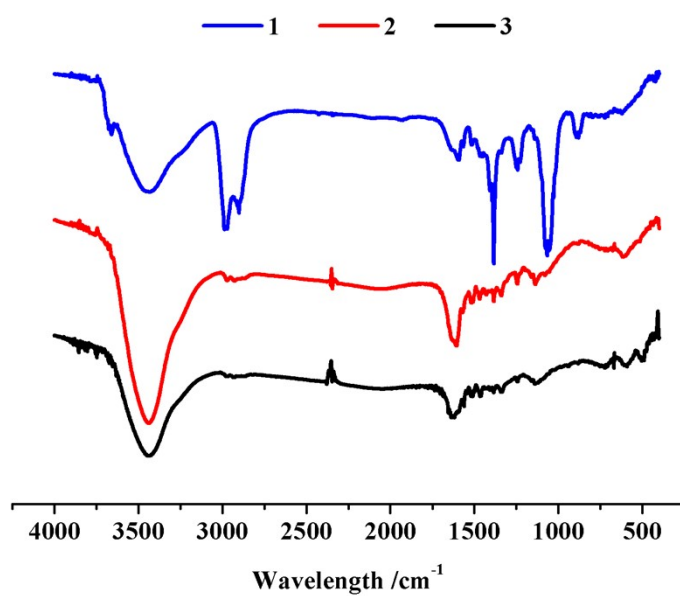

**Figure S4.** Infrared spectra (IR) of clusters **1**–**3**.

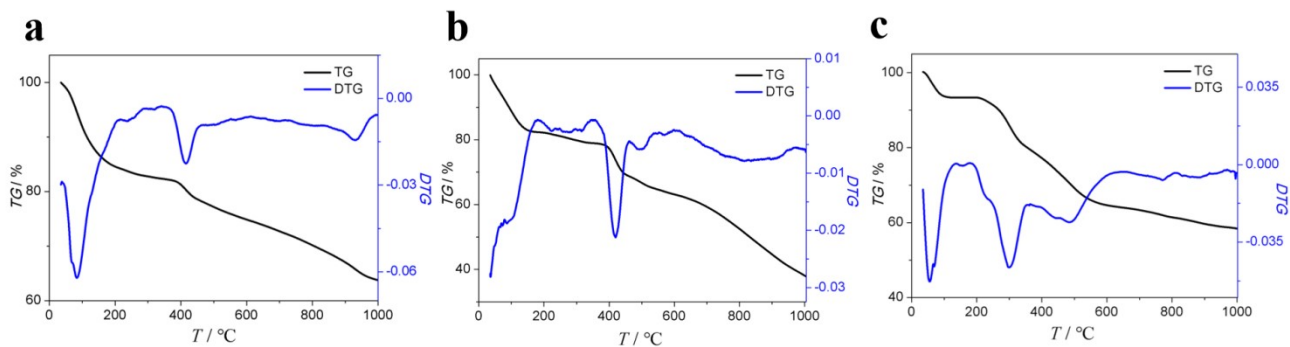

**Figure S5.** TG curve of clusters 1–3.

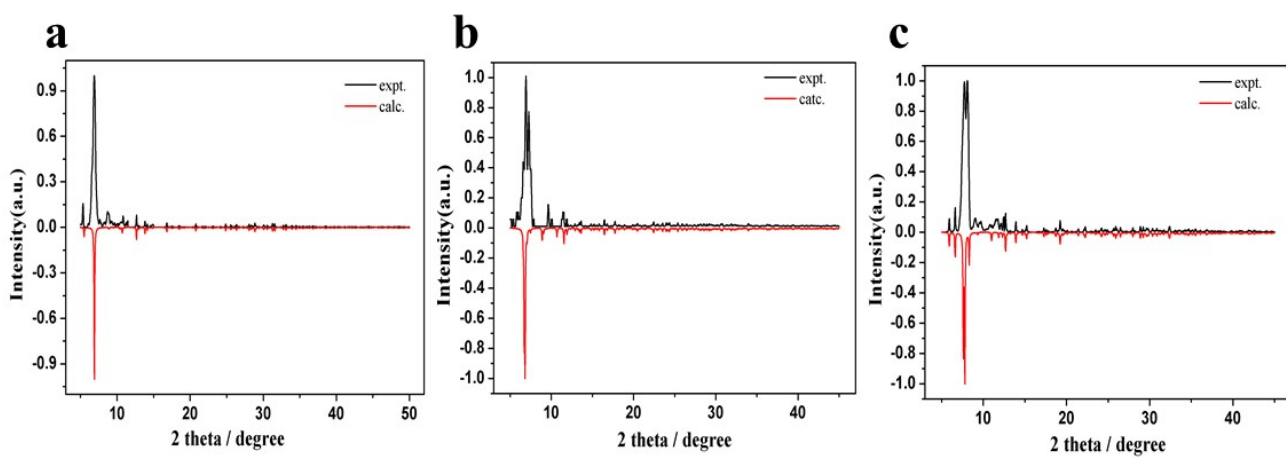

**Figure S6.** Powder diffraction pattern (PXRD) of clusters 1–3.



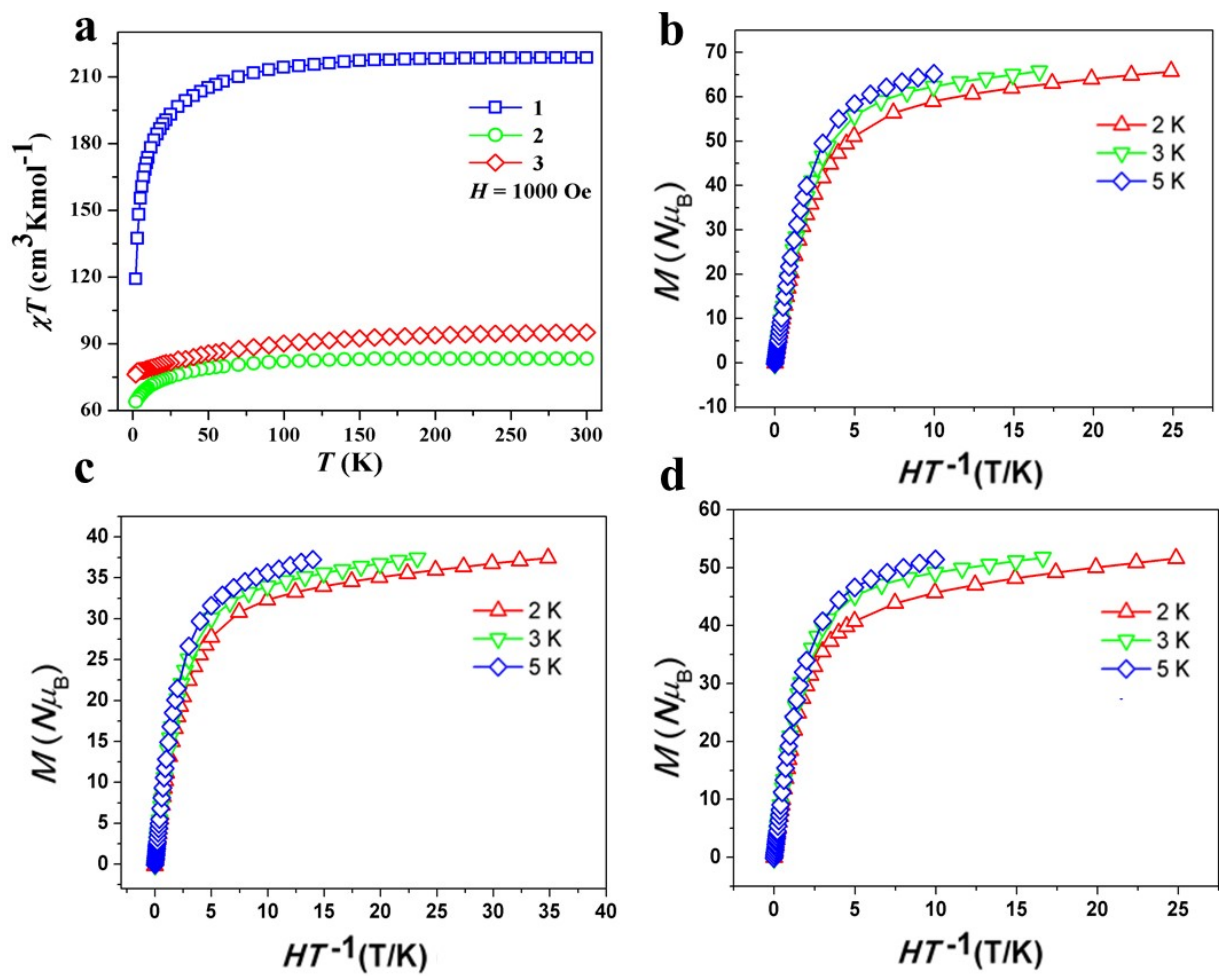

**Figure S7.** Temperature dependence of  $\chi_m T$  for clusters 1–3 (a);  $M$  vs.  $H/T$  plots of clusters 1–3 (b, c and d).

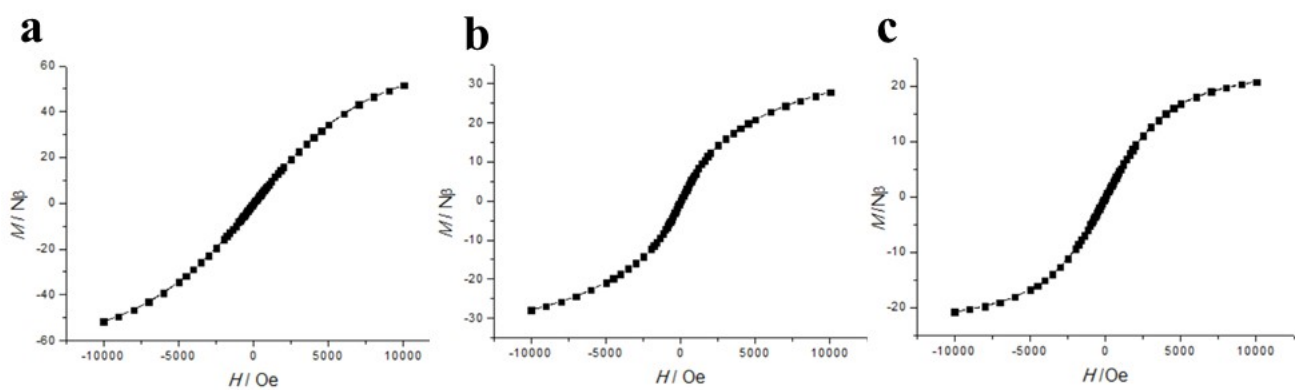

**Figure 8.** Loop curve graph of clusters 1–3 (a–c) at 2 K.

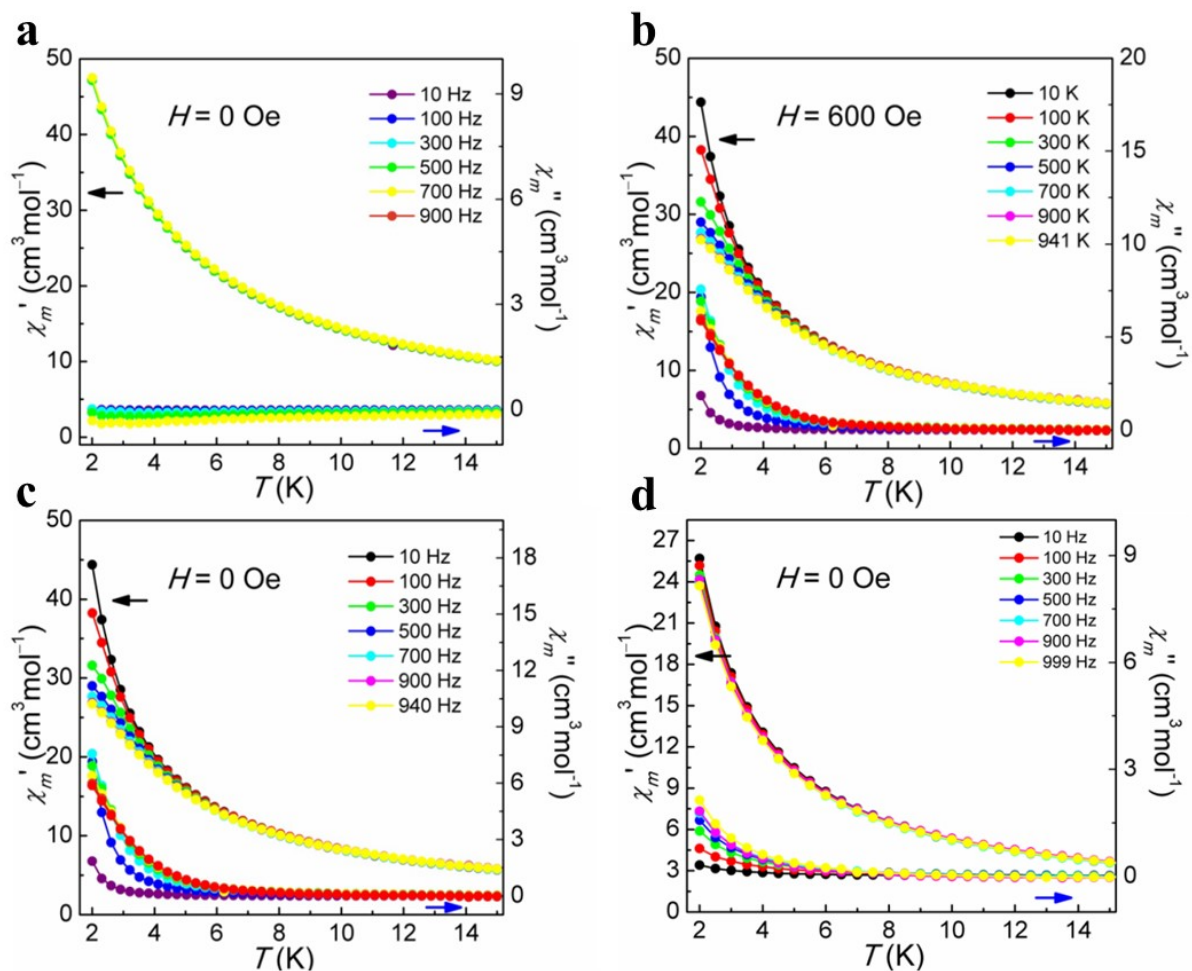

**Figure S9.** Temperature-dependent  $\chi'$  and  $\chi''$  AC susceptibilities under 0 and 600 Oe DC fields for cluster 1 (a and b); temperature-dependent  $\chi'$  and  $\chi''$  AC susceptibilities under 0 Oe DC fields for clusters 2-3 (c and d).

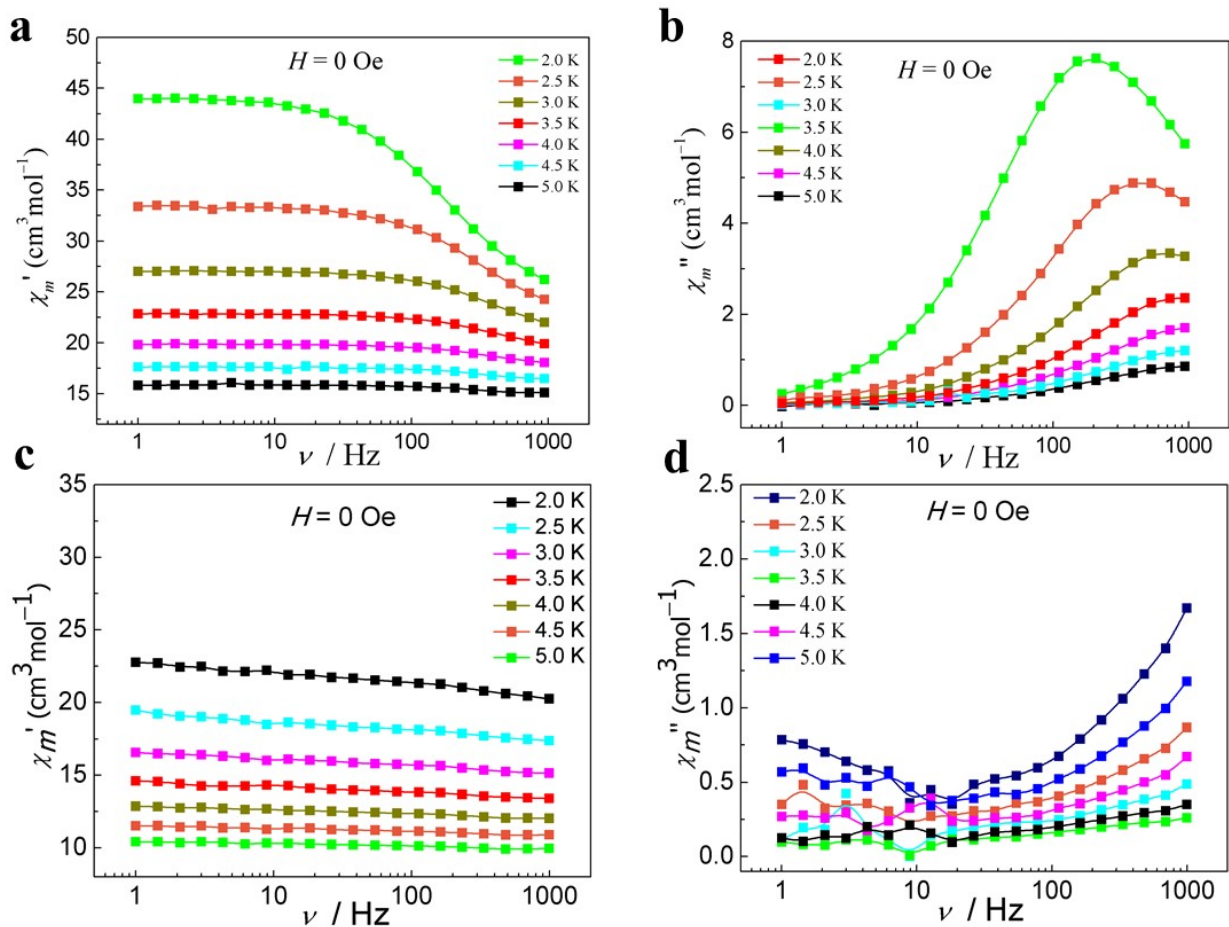

**Figure S10.** Frequency-dependent  $\chi'$  and  $\chi''$  curves under zero fields for clusters **2** and **3**.

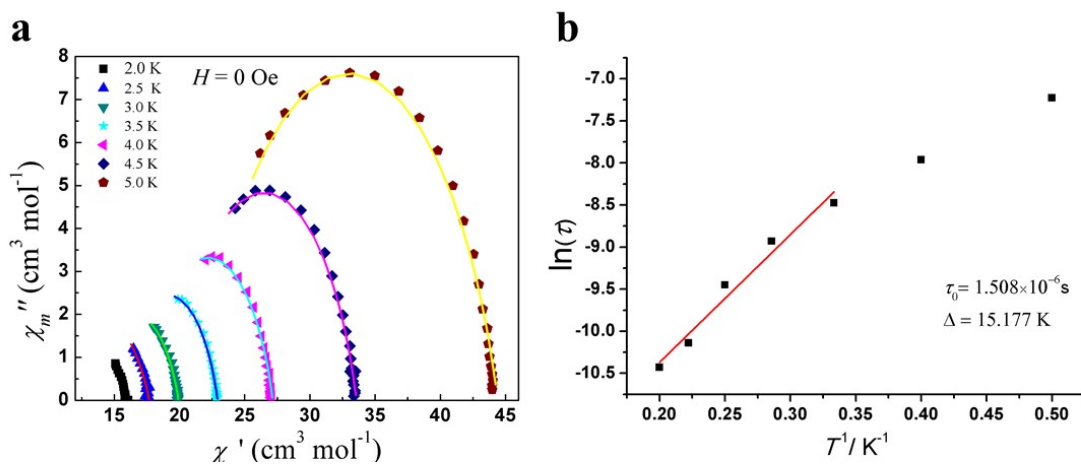

**Figure S11.** Cole–Cole plots for cluster **2**, solid lines are the best fits to the Debye model (a);  $\ln(\tau)$  vs.  $T^{-1}$  plots for cluster **2**, solid lines show the best fits with the Debye formula (linear) (b).

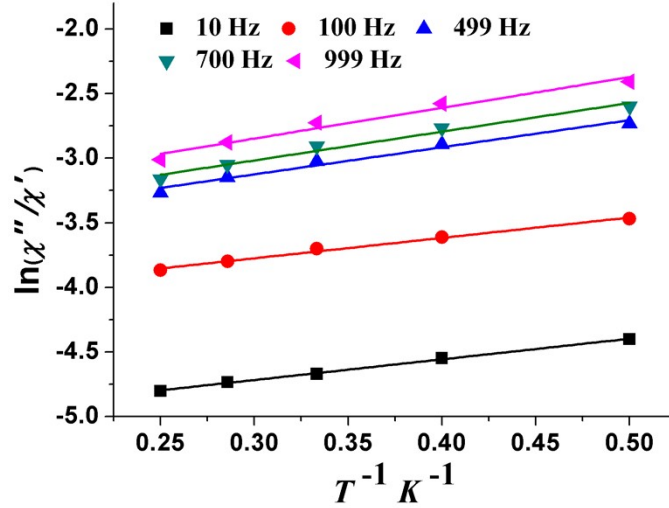

**Figure S12.** Plots of  $\ln(\chi''/\chi')$  vs.  $T^{-1}$  for **3**. The solid lines represent the fitting results over the temperature range of 2–5 K.

**Table S2.** Selected bond lengths (Å) and angles (°) of **1**.

| Bond lengths (Å)      |           |                       |           |                       |          |
|-----------------------|-----------|-----------------------|-----------|-----------------------|----------|
| Dy1—O2                | 2.233(14) | Dy2—O1 <sup>ii</sup>  | 2.337(5)  | Dy4—O7                | 2.423(5) |
| Dy1—O2 <sup>iv</sup>  | 2.233(14) | Dy2—O2 <sup>i</sup>   | 2.352(12) | Dy4—N2                | 2.442(7) |
| Dy1—O2 <sup>iii</sup> | 2.233(14) | Dy2—O2 <sup>iii</sup> | 2.352(11) | Dy4—O4                | 2.332(6) |
| Dy1—O6 <sup>i</sup>   | 2.336(16) | Dy2—O6 <sup>iii</sup> | 2.284(12) | Dy4—O3 <sup>i</sup>   | 2.314(5) |
| Dy1—O6 <sup>iii</sup> | 1.766(13) | Dy2—O6 <sup>i</sup>   | 2.284(12) | Dy4—O5                | 2.357(5) |
| Dy1—O6 <sup>v</sup>   | 2.336(16) | Dy3—O4                | 2.440(5)  | Dy4—O9                | 2.382(6) |
| Dy1—O6                | 1.766(13) | Dy3—O4 <sup>i</sup>   | 2.440(5)  | Dy4—O10               | 2.471(7) |
| Dy1—O6 <sup>ii</sup>  | 2.336(16) | Dy3—O3                | 2.447(5)  | Dy5—O1 <sup>ii</sup>  | 2.381(5) |
| Dy1—O6 <sup>iv</sup>  | 1.766(13) | Dy3—O3 <sup>i</sup>   | 2.447(5)  | Dy5—O1                | 2.381(5) |
| Dy1—Cl2               | 2.425(8)  | Dy3—O5 <sup>i</sup>   | 2.380(5)  | Dy5—O7                | 2.325(6) |
| Dy1—O13               | 2.425(8)  | Dy3—O5                | 2.380(5)  | Dy5—O7 <sup>ii</sup>  | 2.325(6) |
| Dy2—O3 <sup>iii</sup> | 2.424(5)  | Dy3—O2 <sup>i</sup>   | 2.412(12) | Dy5—N1                | 2.496(6) |
| Dy2—O3 <sup>i</sup>   | 2.424(5)  | Dy3—O2                | 2.412(12) | Dy5—N1 <sup>ii</sup>  | 2.496(6) |
| Dy2—O5 <sup>ii</sup>  | 2.393(5)  | Dy3—O6 <sup>i</sup>   | 2.403(12) | Dy5—Cl1               | 2.697(4) |
| Dy2—O5                | 2.393(5)  | Dy3—O6                | 2.403(12) | Dy5—Cl1 <sup>ii</sup> | 2.697(4) |
| Dy2—O1                | 2.337(5)  | Dy4—O1                | 2.415(5)  | Dy5—O12               | 2.697(4) |

  

| Bond angles (°) |  |  |  |  |  |
|-----------------|--|--|--|--|--|
|-----------------|--|--|--|--|--|

---

|                                          |            |                                         |            |                                         |            |
|------------------------------------------|------------|-----------------------------------------|------------|-----------------------------------------|------------|
| O6 <sup>iv</sup> —Dy1—O2 <sup>iii</sup>  | 120.9(5)   | O6 <sup>i</sup> —Dy2—O3 <sup>iii</sup>  | 130.0(4)   | O5—Dy4—N2                               | 146.8(2)   |
| O6 <sup>iii</sup> —Dy1—O6 <sup>v</sup>   | 126.1(4)   | O6 <sup>i</sup> —Dy2—O3 <sup>i</sup>    | 78.6(4)    | O1—Dy4—O7                               | 66.24(18)  |
| O6 <sup>iv</sup> —Dy1—O6 <sup>iii</sup>  | 116.1(3)   | O6 <sup>iii</sup> —Dy2—O5 <sup>ii</sup> | 69.2(3)    | O1—Dy4—N2                               | 129.3(2)   |
| O6 <sup>iii</sup> —Dy1—O6 <sup>ii</sup>  | 58.0(7)    | O6 <sup>i</sup> —Dy2—O5                 | 69.3(3)    | O1—Dy4—O8                               | 67.5(3)    |
| O6—Dy1—O6 <sup>v</sup>                   | 62.4(7)    | O6—Dy3—O4 <sup>i</sup>                  | 137.1(3)   | O1—Dy4—O10                              | 112.9(2)   |
| O6 <sup>iii</sup> —Dy1—O6                | 116.1(3)   | O6—Dy3—O4                               | 131.2(4)   | O7—Dy4—N2                               | 63.3(2)    |
| O6 <sup>ii</sup> —Dy1—O6 <sup>v</sup>    | 79.8(5)    | O6 <sup>i</sup> —Dy3—O4 <sup>i</sup>    | 131.2(4)   | O7—Dy4—O8                               | 119.4(3)   |
| O6 <sup>iv</sup> —Dy1—O6 <sup>v</sup>    | 58.0(7)    | O6 <sup>i</sup> —Dy3—O4                 | 137.1(3)   | O4—Dy4—O5                               | 74.84(18)  |
| O6 <sup>iv</sup> —Dy1—O6 <sup>i</sup>    | 126.1(4)   | O6 <sup>i</sup> —Dy3—O3                 | 120.5(3)   | O4—Dy4—O9                               | 125.5(2)   |
| O6 <sup>iv</sup> —Dy1—O6                 | 116.1(3)   | O6—Dy3—O3                               | 75.9(3)    | O4—Dy4—O1                               | 144.97(18) |
| O6 <sup>iii</sup> —Dy1—O6 <sup>i</sup>   | 62.4(7)    | O6 <sup>i</sup> —Dy3—O3 <sup>i</sup>    | 75.9(3)    | O4—Dy4—O7                               | 125.7(2)   |
| O6 <sup>iv</sup> —Dy1—O6 <sup>ii</sup>   | 62.3(7)    | O6—Dy3—O3 <sup>i</sup>                  | 120.5(3)   | O4—Dy4—N2                               | 74.7(2)    |
| O6—Dy1—O6 <sup>i</sup>                   | 58.0(7)    | O6 <sup>i</sup> —Dy3—O2 <sup>i</sup>    | 19.8(3)    | O4—Dy4—O8                               | 114.6(3)   |
| O6—Dy1—O6 <sup>ii</sup>                  | 126.1(4)   | O6—Dy3—O2 <sup>i</sup>                  | 68.1(7)    | O4—Dy4—O10                              | 74.1(2)    |
| O6 <sup>ii</sup> —Dy1—O6 <sup>i</sup>    | 79.8(5)    | O6—Dy3—O6 <sup>i</sup>                  | 50.5(7)    | O3 <sup>i</sup> —Dy4—O4                 | 75.56(19)  |
| O6 <sup>v</sup> —Dy1—O6 <sup>i</sup>     | 79.8(5)    | O4—Dy3—O3                               | 95.58(18)  | O3 <sup>i</sup> —Dy4—O5                 | 62.48(19)  |
| O2 <sup>iv</sup> —Dy1—O2                 | 118.0(2)   | O3—Dy3—O3 <sup>i</sup>                  | 163.2(2)   | O3 <sup>i</sup> —Dy4—O9                 | 153.18(19) |
| O2 <sup>iii</sup> —Dy1—O2                | 118.0(2)   | O5—Dy3—O4                               | 72.47(19)  | O3 <sup>i</sup> —Dy4—O1                 | 76.12(18)  |
| O6 <sup>iii</sup> —Dy1—O2 <sup>iii</sup> | 19.8(5)    | O5 <sup>i</sup> —Dy3—O4                 | 147.49(18) | O3 <sup>i</sup> —Dy4—O7                 | 77.33(18)  |
| O6 <sup>iii</sup> —Dy1—O2 <sup>iv</sup>  | 120.9(5)   | O5 <sup>i</sup> —Dy3—O4 <sup>i</sup>    | 72.47(19)  | O3 <sup>i</sup> —Dy4—N2                 | 97.2(2)    |
| O6—Dy1—O2 <sup>iv</sup>                  | 120.9(5)   | O5—Dy3—O4 <sup>i</sup>                  | 147.50(18) | O3 <sup>i</sup> —Dy4—O8                 | 125.1(3)   |
| O6 <sup>iv</sup> —Dy1—O2 <sup>iv</sup>   | 19.8(5)    | O5 <sup>i</sup> —Dy3—O3                 | 60.23(18)  | O5—Dy4—O8                               | 68.8(4)    |
| O6—Dy1—O2 <sup>iii</sup>                 | 120.9(5)   | O5—Dy3—O3 <sup>i</sup>                  | 60.23(18)  | O5—Dy4—O10                              | 75.9(2)    |
| O3 <sup>iii</sup> —Dy2—O3 <sup>i</sup>   | 150.7(2)   | O5—Dy3—O3                               | 126.83(18) | O1—Dy5—O1 <sup>ii</sup>                 | 73.1(3)    |
| O5—Dy2—O3 <sup>i</sup>                   | 60.38(18)  | O5 <sup>i</sup> —Dy3—O3 <sup>i</sup>    | 126.83(18) | O1—Dy5—N1                               | 123.6(2)   |
| O5—Dy2—O3 <sup>iii</sup>                 | 129.65(18) | O5 <sup>i</sup> —Dy3—O5                 | 138.7(3)   | O1 <sup>ii</sup> —Dy5—N1                | 143.7(2)   |
| O5 <sup>i</sup> —Dy2—O3 <sup>iii</sup>   | 60.39(18)  | O5 <sup>i</sup> —Dy3—O2 <sup>i</sup>    | 71.7(3)    | O1—Dy5—N1 <sup>ii</sup>                 | 143.7(2)   |
| O5 <sup>ii</sup> —Dy2—O3 <sup>i</sup>    | 129.65(18) | O5—Dy3—O2 <sup>i</sup>                  | 78.5(4)    | O1 <sup>ii</sup> —Dy5—N1 <sup>ii</sup>  | 123.6(2)   |
| O5—Dy2—O5 <sup>ii</sup>                  | 146.9(3)   | O5—Dy3—O2                               | 71.7(3)    | O1 <sup>ii</sup> —Dy5—C11               | 137.72(14) |
| O1—Dy2—O3 <sup>iii</sup>                 | 81.25(18)  | O5 <sup>i</sup> —Dy3—O2                 | 78.6(3)    | O1 <sup>ii</sup> —Dy5—C11 <sup>ii</sup> | 72.35(15)  |

---

|                                          |            |                                      |            |                                         |            |
|------------------------------------------|------------|--------------------------------------|------------|-----------------------------------------|------------|
| O1 <sup>ii</sup> —Dy2—O3 <sup>iii</sup>  | 75.50(18)  | O5 <sup>i</sup> —Dy3—O6 <sup>i</sup> | 75.2(3)    | O1—Dy5—Cl1                              | 72.35(15)  |
| O1 <sup>ii</sup> —Dy2—O3 <sup>i</sup>    | 81.26(18)  | O5 <sup>i</sup> —Dy3—O6              | 67.5(3)    | O1—Dy5—Cl1 <sup>ii</sup>                | 137.72(14) |
| O1—Dy2—O3 <sup>i</sup>                   | 75.51(18)  | O5—Dy3—O6 <sup>i</sup>               | 67.6(3)    | O1 <sup>ii</sup> —Dy5—O12               | 137.72(14) |
| O1—Dy2—O5 <sup>ii</sup>                  | 135.63(19) | O5—Dy3—O6                            | 75.2(3)    | O1—Dy5—O12                              | 72.35(15)  |
| O1 <sup>ii</sup> —Dy2—O5                 | 135.63(19) | O2—Dy3—O4                            | 113.1(4)   | O7—Dy5—O1                               | 68.33(18)  |
| O1—Dy2—O5                                | 74.78(19)  | O2—Dy3—O4 <sup>i</sup>               | 136.3(3)   | O7—Dy5—O1 <sup>ii</sup>                 | 98.39(19)  |
| O1 <sup>ii</sup> —Dy2—O5 <sup>ii</sup>   | 74.78(19)  | O2 <sup>i</sup> —Dy3—O4              | 136.3(3)   | O7 <sup>ii</sup> —Dy5—O1                | 98.39(19)  |
| O1 <sup>ii</sup> —Dy2—O1                 | 74.7(3)    | O2 <sup>i</sup> —Dy3—O4 <sup>i</sup> | 113.1(4)   | O7 <sup>ii</sup> —Dy5—O1 <sup>ii</sup>  | 68.33(18)  |
| O1—Dy2—O2 <sup>iii</sup>                 | 107.1(5)   | O2 <sup>i</sup> —Dy3—O3              | 128.0(3)   | O7 <sup>ii</sup> —Dy5—O7                | 164.0(3)   |
| O1—Dy2—O2 <sup>i</sup>                   | 141.9(3)   | O2—Dy3—O3                            | 66.2(3)    | O7—Dy5—N1                               | 65.7(2)    |
| O1 <sup>ii</sup> —Dy2—O2 <sup>iii</sup>  | 141.9(3)   | O4—Dy3—O4 <sup>i</sup>               | 79.5(3)    | O7 <sup>ii</sup> —Dy5—N1 <sup>ii</sup>  | 65.7(2)    |
| O1 <sup>ii</sup> —Dy2—O2 <sup>i</sup>    | 107.1(5)   | O4 <sup>i</sup> —Dy3—O3              | 71.23(18)  | O7 <sup>ii</sup> —Dy5—N1                | 130.2(2)   |
| O2 <sup>i</sup> —Dy2—O5                  | 79.5(4)    | O4—Dy3—O3 <sup>i</sup>               | 71.24(18)  | O7—Dy5—N1 <sup>ii</sup>                 | 130.2(2)   |
| O2 <sup>iii</sup> —Dy2—O5                | 78.2(3)    | O4 <sup>i</sup> —Dy3—O3 <sup>i</sup> | 95.58(18)  | O7 <sup>ii</sup> —Dy5—Cl1               | 93.57(17)  |
| O6 <sup>i</sup> —Dy2—O5 <sup>ii</sup>    | 81.6(3)    | O7—Dy4—O10                           | 149.1(2)   | O7 <sup>ii</sup> —Dy5—Cl1 <sup>ii</sup> | 90.76(17)  |
| O6 <sup>iii</sup> —Dy2—O5                | 81.6(3)    | N2—Dy4—O8                            | 137.6(3)   | O7—Dy5—Cl1                              | 90.75(17)  |
| O6 <sup>iii</sup> —Dy2—O1                | 127.0(4)   | N2—Dy4—O10                           | 107.6(2)   | O7—Dy5—Cl1 <sup>ii</sup>                | 93.58(17)  |
| O6 <sup>iii</sup> —Dy2—O1 <sup>ii</sup>  | 142.7(3)   | O9—Dy4—O1                            | 88.11(19)  | O7 <sup>ii</sup> —Dy5—O12               | 93.57(17)  |
| O6 <sup>i</sup> —Dy2—O1 <sup>ii</sup>    | 127.0(4)   | O9—Dy4—O7                            | 76.48(19)  | O7—Dy5—O12                              | 90.75(17)  |
| O6 <sup>i</sup> —Dy2—O1                  | 142.8(3)   | O9—Dy4—N2                            | 76.0(2)    | N1 <sup>ii</sup> —Dy5—N1                | 64.6(3)    |
| O6 <sup>i</sup> —Dy2—O2 <sup>iii</sup>   | 75.1(7)    | O9—Dy4—O8                            | 65.1(4)    | N1—Dy5—Cl1 <sup>ii</sup>                | 76.20(18)  |
| O6 <sup>iii</sup> —Dy2—O2 <sup>iii</sup> | 20.5(3)    | O9—Dy4—O10                           | 72.7(2)    | N1—Dy5—Cl1                              | 77.24(17)  |
| O6 <sup>i</sup> —Dy2—O2 <sup>i</sup>     | 20.5(3)    | O10—Dy4—O8                           | 45.8(3)    | N1 <sup>ii</sup> —Dy5—Cl1 <sup>ii</sup> | 77.24(17)  |
| O6 <sup>iii</sup> —Dy2—O2 <sup>i</sup>   | 75.1(7)    | O3 <sup>i</sup> —Dy4—O10             | 133.4(2)   | N1 <sup>ii</sup> —Dy5—Cl1               | 76.20(18)  |
| O6 <sup>iii</sup> —Dy2—O6 <sup>i</sup>   | 57.0(8)    | O5—Dy4—O9                            | 133.9(2)   | N1—Dy5—O12                              | 77.24(17)  |
| O6 <sup>iii</sup> —Dy2—O3 <sup>i</sup>   | 130.0(4)   | O5—Dy4—O1                            | 74.01(17)  | N1 <sup>ii</sup> —Dy5—O12               | 76.20(18)  |
| O6 <sup>iii</sup> —Dy2—O3 <sup>iii</sup> | 78.6(4)    | O5—Dy4—O7                            | 128.80(18) |                                         |            |

**Table S3.** Selected bond lengths (Å) and angles (°) of **2**.

| Bond lengths (Å)    |          |        |          |        |          |
|---------------------|----------|--------|----------|--------|----------|
| Dy1—O2 <sup>i</sup> | 2.456(3) | Dy2—O2 | 2.322(3) | Dy2—N2 | 2.498(4) |

|         |           |                     |          |                     |          |
|---------|-----------|---------------------|----------|---------------------|----------|
| Dy1—O3  | 2.417(3)  | Dy2—O3 <sup>i</sup> | 2.411(3) | Dy3—O1 <sup>i</sup> | 2.371(3) |
| Dy1—O6  | 2.352(3)  | Dy2—O1              | 2.292(3) | Dy3—O3              | 2.445(3) |
| Dy1—O9  | 2.329(3)  | Dy2—O2 <sup>i</sup> | 2.444(3) | Dy3—O5              | 2.288(4) |
| Dy1—N1  | 2.596(4)  | Dy2—O2              | 2.322(3) | Dy3—O6              | 2.362(3) |
| Dy1—N4  | 2.623(4)  | Dy2—O3 <sup>i</sup> | 2.411(3) | Dy3—O7              | 2.218(3) |
| Dy1—Cl1 | 2.713(14) | Dy2—O4 <sup>i</sup> | 2.343(4) | Dy3—O10             | 2.384(4) |
| Dy1—Cl2 | 2.687(13) | Dy2—O8              | 2.405(4) | Dy3—O11             | 2.513(4) |
| Dy2—O1  | 2.292(3)  | Dy2—O9              | 2.372(3) | Dy3—N7              | 2.480(4) |

### Bond angles (°)

|                          |            |                                      |            |                          |            |
|--------------------------|------------|--------------------------------------|------------|--------------------------|------------|
| O2 <sup>i</sup> —Dy1—N1  | 119.94(12) | N4—Dy1—Cl2                           | 74.82(10)  | O9—Dy2—N2                | 64.00(12)  |
| O2 <sup>i</sup> —Dy1—N4  | 153.13(12) | Cl2—Dy1—Cl1                          | 152.72(4)  | O9—Dy2—O8                | 76.24(13)  |
| O2 <sup>i</sup> —Dy1—Cl1 | 127.69(8)  | N1—Dy1—Cl2                           | 82.72(10)  | O1 <sup>i</sup> —Dy3—O3  | 66.38(11)  |
| O2 <sup>i</sup> —Dy1—Cl2 | 78.55(8)   | N4—Dy1—Cl1                           | 79.19(10)  | O1 <sup>i</sup> —Dy3—O10 | 137.63(12) |
| O3—Dy1—O2 <sup>i</sup>   | 65.30(11)  | O1—Dy2—O2 <sup>i</sup>               | 158.51(10) | O1 <sup>i</sup> —Dy3—O11 | 153.63(13) |
| O3—Dy1—N1                | 153.15(12) | O1—Dy2—O2                            | 91.00(11)  | O1 <sup>i</sup> —Dy3—N7  | 99.20(14)  |
| O3—Dy1—N4                | 128.46(12) | O1—Dy2—O3 <sup>i</sup>               | 68.15(11)  | O3—Dy3—O11               | 135.22(13) |
| O3—Dy1—Cl1               | 79.90(8)   | O1—Dy2—O4 <sup>i</sup>               | 104.17(13) | O3—Dy3—N7                | 131.62(13) |
| O3—Dy1—Cl2               | 123.25(8)  | O1—Dy2—O8                            | 88.96(13)  | O5—Dy3—O1 <sup>i</sup>   | 95.14(13)  |
| O3—Dy1—O2 <sup>i</sup>   | 65.30(11)  | O1—Dy2—O9                            | 134.88(11) | O5—Dy3—O3                | 78.73(12)  |
| O3—Dy1—N1                | 153.15(12) | O1—Dy2—N2                            | 71.20(12)  | O5—Dy3—O6                | 145.72(12) |
| O3—Dy1—N4                | 128.46(12) | O2—Dy2—O2 <sup>i</sup>               | 76.07(12)  | O5—Dy3—O10               | 85.17(15)  |
| O3—Dy1—Cl1               | 79.90(8)   | O2—Dy2—O3 <sup>i</sup>               | 67.45(11)  | O5—Dy3—O11               | 78.44(15)  |
| O3—Dy1—Cl2               | 123.25(8)  | O2—Dy2—O4 <sup>i</sup>               | 131.45(12) | O5—Dy3—N7                | 149.61(14) |
| O6—Dy1—O2 <sup>i</sup>   | 113.44(11) | O2—Dy2—O8                            | 73.49(12)  | O6—Dy3—O1 <sup>i</sup>   | 79.58(12)  |
| O6—Dy1—O3                | 68.70(11)  | O2—Dy2—O9                            | 123.48(11) | O6—Dy3—O3                | 68.06(11)  |
| O6—Dy1—N1                | 123.00(12) | O2 <sup>i</sup> —Dy2—N2              | 128.44(11) | O6—Dy3—O10               | 77.05(14)  |
| O6—Dy1—N4                | 63.28(12)  | O2—Dy2—N2                            | 145.37(13) | O6—Dy3—O11               | 119.77(14) |
| O6—Dy1—Cl1               | 85.94(10)  | O3 <sup>i</sup> —Dy2—O2 <sup>i</sup> | 90.85(10)  | O6—Dy3—N7                | 63.87(13)  |
| O6—Dy1—Cl2               | 89.67(10)  | O3 <sup>i</sup> —Dy2—N2              | 126.94(12) | O7—Dy3—O1 <sup>i</sup>   | 79.29(12)  |
| O9—Dy1—O2 <sup>i</sup>   | 66.52(10)  | O4 <sup>i</sup> —Dy2—O2 <sup>i</sup> | 73.61(12)  | O7—Dy3—O3                | 139.61(11) |

|                        |            |                                      |            |             |            |
|------------------------|------------|--------------------------------------|------------|-------------|------------|
| O9—Dy1—O3              | 99.59(11)  | O4 <sup>i</sup> —Dy2—O3 <sup>i</sup> | 75.98(12)  | O7—Dy3—O5   | 84.05(14)  |
| O9—Dy1—O6              | 165.43(13) | O4 <sup>i</sup> —Dy2—O8              | 150.36(12) | O7—Dy3—O6   | 127.14(13) |
| O9—Dy1—N1              | 64.00(12)  | O4 <sup>i</sup> —Dy2—O9              | 75.73(12)  | O7—Dy3—O10  | 142.38(14) |
| O9—Dy1—N4              | 123.85(12) | O4 <sup>i</sup> —Dy2—N2              | 82.56(14)  | O7—Dy3—O11  | 74.64(14)  |
| O9—Dy1—Cl1             | 83.39(9)   | O8—Dy2—O2 <sup>i</sup>               | 103.33(13) | O7—Dy3—N7   | 72.59(13)  |
| O9—Dy1—Cl2             | 104.32(9)  | O8—Dy2—O3 <sup>i</sup>               | 133.60(12) | O10—Dy3—O3  | 72.23(12)  |
| N1—Dy1—N4              | 60.20(13)  | O8—Dy2—N2                            | 76.64(14)  | O10—Dy3—O11 | 67.90(14)  |
| N1—Dy1—Cl1             | 77.26(10)  | O9—Dy2—O2 <sup>i</sup>               | 66.07(10)  | O10—Dy3—N7  | 101.46(15) |
| O9—Dy2—O3 <sup>i</sup> | 147.55(12) | N7—Dy3—O11                           | 76.83(16)  |             |            |

**Table S4.** Selected bond lengths (Å) and angles (°) of **3**.

| <b>Bond lengths (Å)</b>              |            |                        |            |                          |           |
|--------------------------------------|------------|------------------------|------------|--------------------------|-----------|
| Dy1—O1 <sup>i</sup>                  | 2.407(4)   | Dy2—O9                 | 2.281(5)   | Dy4—O9 <sup>i</sup>      | 2.285(5)  |
| Dy1—O1                               | 2.407(4)   | Dy2—N11                | 2.661(7)   | Dy4—O9                   | 2.285(5)  |
| Dy1—O2                               | 2.374(5)   | Dy2—N10                | 2.597(6)   | Dy4—O11                  | 2.397(6)  |
| Dy1—O2 <sup>i</sup>                  | 2.374 (5)  | Dy3—O1                 | 2.357(5)   | Dy4—O11 <sup>i</sup>     | 2.398(7)  |
| Dy1—O3                               | 2.342(4)   | Dy3—O2                 | 2.404(4)   | Dy4—O15 <sup>i</sup>     | 2.542(6)  |
| Dy1—O3 <sup>i</sup>                  | 2.342 (4)  | Dy3—O4                 | 2.312 (5)  | Dy4—O15                  | 2.542(6)  |
| Dy1—O6 <sup>i</sup>                  | 2.342(5)   | Dy3—O5                 | 2.361(5)   | Dy5—O5 <sup>i</sup>      | 2.276(5)  |
| Dy1—O6                               | 2.342 (5)  | Dy3—O6 <sup>i</sup>    | 2.414(5)   | Dy5—O5                   | 2.276(5)  |
| Dy2—O1                               | 2.474 (4)  | Dy3—O10                | 2.505(6)   | Dy5—O6                   | 2.371(5)  |
| Dy2—O2                               | 2.297(5)   | Dy3—N7                 | 2.487(6)   | Dy5—O6 <sup>i</sup>      | 2.371(5)  |
| Dy2—O3 <sup>i</sup>                  | 2.424(5)   | Dy3—O12                | 2.526(7)   | Dy5—N5 <sup>i</sup>      | 2.490(6)  |
| Dy2—O4                               | 2.348(4)   | Dy3—O14                | 2.489(6)   | Dy5—N5                   | 2.490(6)  |
| Dy2—O7                               | 2.522(6)   | Dy4—O3                 | 2.331(4)   | Dy5—O23 <sup>i</sup>     | 2.251(8)  |
| Dy2—O8                               | 2.475(6)   | Dy4—O3 <sup>i</sup>    | 2.331 (4)  | Dy5—O23                  | 2.251(8)  |
| <b>Bond angles (°)</b>               |            |                        |            |                          |           |
| O2 <sup>i</sup> —Dy1—O1              | 127.15(17) | O9—Dy2—O2              | 91.06(18)  | O3 <sup>i</sup> —Dy4—O3  | 70.6(2)   |
| O2—Dy1—O1                            | 61.15(16)  | O9—Dy2—O3 <sup>i</sup> | 67.51 (16) | O3—Dy4—O11 <sup>i</sup>  | 124.1 (2) |
| O2 <sup>i</sup> —Dy1—O1 <sup>i</sup> | 61.15(16)  | O9—Dy2—O4              | 140.56(19) | O3—Dy4—O11               | 75.22(19) |
| O2—Dy1—O1 <sup>i</sup>               | 127.15(17) | O9—Dy2—O7              | 88.6(2)    | O3 <sup>i</sup> —Dy4—O11 | 124.1(2)  |



|                                      |            |                        |            |                                        |            |
|--------------------------------------|------------|------------------------|------------|----------------------------------------|------------|
| O1—Dy1—O1 <sup>i</sup>               | 152.1(2)   | O9—Dy2—O8              | 129.9(2)   | O3 <sup>i</sup> —Dy4—O11 <sup>i</sup>  | 75.22(19)  |
| O3—Dy1—O1 <sup>i</sup>               | 73.68(15)  | O9—Dy2—N11             | 65.4(2)    | O3—Dy4—O15 <sup>i</sup>                | 159.6(2)   |
| O3 <sup>i</sup> —Dy1—O1 <sup>i</sup> | 132.51(15) | O9—Dy2—N2              | 109.1(2)   | O3 <sup>i</sup> —Dy4—O15 <sup>i</sup>  | 123.3(2)   |
| O3 <sup>i</sup> —Dy1—O1              | 73.68(15)  | O9—Dy2—N10             | 66.5(2)    | O3 <sup>i</sup> —Dy4—O15               | 159.6(2)   |
| O3—Dy1—O1                            | 132.51(15) | N11—Dy2—N2             | 138.2(2)   | O3—Dy4—O15                             | 123.3(2)   |
| O3 <sup>i</sup> —Dy1—O2              | 75.63(16)  | N10—Dy2—N11            | 69.6(2)    | O3 <sup>i</sup> —Dy4—N1                | 144.72(11) |
| O3—Dy1—O2                            | 80.59(16)  | N10—Dy2—N2             | 70.7(2)    | O3—Dy4—N1                              | 144.72(11) |
| O3—Dy1—O2 <sup>i</sup>               | 75.63(16)  | O2—Dy2—N11             | 71.02(19)  | O9 <sup>i</sup> —Dy4—O3 <sup>i</sup>   | 104.74(17) |
| O3 <sup>i</sup> —Dy1—O2 <sup>i</sup> | 80.59(16)  | O1—Dy3—O2              | 61.43(16)  | O9—Dy4—O3                              | 104.74(17) |
| O3—Dy1—O3 <sup>i</sup>               | 70.2(2)    | O1—Dy3—O5              | 81.44(17)  | O9 <sup>i</sup> —Dy4—O3                | 69.08(17)  |
| O3—Dy1—O6 <sup>i</sup>               | 120.48(18) | O1—Dy3—O6 <sup>i</sup> | 76.01(16)  | O9—Dy4—O3 <sup>i</sup>                 | 69.08(17)  |
| O3—Dy1—O6                            | 144.55(17) | O1—Dy3—O10             | 155.52(19) | O9 <sup>i</sup> —Dy4—O9                | 172.8(2)   |
| O3 <sup>i</sup> —Dy1—O6 <sup>i</sup> | 144.55(16) | O1—Dy3—N7              | 91.24(19)  | O9 <sup>i</sup> —Dy4—O11               | 102.4(2)   |
| O3 <sup>i</sup> —Dy1—O6              | 120.48(18) | O1—Dy3—O12             | 127.56(19) | O9—Dy4—O11                             | 79.0(2)    |
| O6 <sup>i</sup> —Dy1—O1              | 76.42(16)  | O1—Dy3—O14             | 144.35(18) | O9—Dy4—O11 <sup>i</sup>                | 102.4(2)   |
| O6—Dy1—O1 <sup>i</sup>               | 76.43(16)  | O1—Dy3—N9              | 162.8(2)   | O9 <sup>i</sup> —Dy4—O11 <sup>i</sup>  | 79.0(2)    |
| O6 <sup>i</sup> —Dy1—O1 <sup>i</sup> | 81.09(16)  | O2—Dy3—O6 <sup>i</sup> | 71.69(15)  | O9—Dy4—O15 <sup>i</sup>                | 71.0(2)    |
| O6—Dy1—O1                            | 81.09(16)  | O2—Dy3—O10             | 139.8(2)   | O9—Dy4—O15                             | 116.1(2)   |
| O6 <sup>i</sup> —Dy1—O2              | 73.49(17)  | O2—Dy3—N7              | 142.63(18) | O9 <sup>i</sup> —Dy4—O15               | 71.0(2)    |
| O6 <sup>i</sup> —Dy1—O2 <sup>i</sup> | 133.68(16) | O2—Dy3—O12             | 69.60(19)  | O9 <sup>i</sup> —Dy4—O15 <sup>i</sup>  | 116.1(2)   |
| O6—Dy1—O2                            | 133.68(16) | O2—Dy3—O14             | 110.80(19) | O9 <sup>i</sup> —Dy4—N1                | 93.61(12)  |
| O6—Dy1—O2 <sup>i</sup>               | 73.49(17)  | O2—Dy3—N9              | 128.4(2)   | O9—Dy4—N1                              | 93.61(12)  |
| O6—Dy1—O6 <sup>i</sup>               | 72.3(3)    | O4—Dy3—O1              | 72.62(16)  | O11—Dy4—O11 <sup>i</sup>               | 158.4(3)   |
| O1—Dy2—O7                            | 92.66(17)  | O4—Dy3—O2              | 73.92(15)  | O11 <sup>i</sup> —Dy4—O15 <sup>i</sup> | 75.9(2)    |
| O1—Dy2—O8                            | 81.90(17)  | O4—Dy3—O5              | 128.37(18) | O11—Dy4—O15 <sup>i</sup>               | 84.4(2)    |
| O1—Dy2—N11                           | 125.97(19) | O4—Dy3—O6 <sup>i</sup> | 141.47(15) | O11—Dy4—O15                            | 75.9(2)    |
| O1—Dy2—N2                            | 88.50(18)  | O4—Dy3—O10             | 119.81(18) | O11 <sup>i</sup> —Dy4—O15              | 84.4(2)    |
| O1—Dy2—N10                           | 155.7(2)   | O4—Dy3—N7              | 73.72(17)  | O11 <sup>i</sup> —Dy4—N1               | 79.20(15)  |
| O2—Dy2—O1                            | 61.17(16)  | O4—Dy3—O12             | 111.4(2)   | O11—Dy4—N1                             | 79.20(15)  |
| O2—Dy2—O3 <sup>i</sup>               | 75.49(16)  | O4—Dy3—O14             | 71.88(19)  | O5—Dy5—O5 <sup>i</sup>                 | 165.1(2)   |

|                          |            |                          |            |                                       |            |
|--------------------------|------------|--------------------------|------------|---------------------------------------|------------|
| O2—Dy2—O4                | 75.28(17)  | O4—Dy3—N9                | 95.6 (2)   | O5—Dy5—O6                             | 98.81(17)  |
| O2—Dy2—O7                | 140.94(17) | O5—Dy3—O2                | 129.41(16) | O5—Dy5—O6 <sup>i</sup>                | 68.65(17)  |
| O2—Dy2—O8                | 138.58(17) | O5—Dy3—O6 <sup>i</sup>   | 66.57(16)  | O5 <sup>i</sup> —Dy5—O6 <sup>i</sup>  | 98.81(17)  |
| O2—Dy2—N2                | 149.24(18) | O5—Dy3—O10               | 74.45(19)  | O5 <sup>i</sup> —Dy5—O6               | 68.65(17)  |
| O2—Dy2—N10               | 140.0(2)   | O5—Dy3—N7                | 62.86(18)  | O5—Dy5—N5                             | 65.98(18)  |
| O3 <sup>i</sup> —Dy2—O1  | 71.09(14)  | O5—Dy3—O12               | 119.8(2)   | O5—Dy5—N5 <sup>i</sup>                | 128.89(19) |
| O3 <sup>i</sup> —Dy2—O7  | 68.37(16)  | O5—Dy3—O14               | 119.11(18) | O5 <sup>i</sup> —Dy5—N5               | 128.89(19) |
| O3 <sup>i</sup> —Dy2—O8  | 111.39(18) | O5—Dy3—N9                | 97.1(2)    | O5 <sup>i</sup> —Dy5—N5 <sup>i</sup>  | 65.97(18)  |
| O3 <sup>i</sup> —Dy2—N11 | 120.40(18) | O6 <sup>i</sup> —Dy3—O10 | 97.82(18)  | O23—Dy5—O5 <sup>i</sup>               | 90.4(4)    |
| O3 <sup>i</sup> —Dy2—N2  | 90.63(18)  | O6 <sup>i</sup> —Dy3—N7  | 129.12(18) | O23—Dy5—O5                            | 93.7(4)    |
| O3 <sup>i</sup> —Dy2—N10 | 119.98(18) | O6 <sup>i</sup> —Dy3—O12 | 71.9(2)    | O23 <sup>i</sup> —Dy5—O5 <sup>i</sup> | 93.7(4)    |
| O4—Dy2—O1                | 69.93(15)  | O6 <sup>i</sup> —Dy3—O14 | 137.4(2)   | O23 <sup>i</sup> —Dy5—O5              | 90.4(4)    |
| O4—Dy2—O3 <sup>i</sup>   | 139.08(15) | O6 <sup>i</sup> —Dy3—N9  | 119.3(2)   | O23 <sup>i</sup> —Dy5—O6              | 74.3(3)    |
| O4—Dy2—O7                | 125.18(17) | O10—Dy3—O12              | 70.3(2)    | O23—Dy5—O6 <sup>i</sup>               | 74.3(3)    |
| O4—Dy2—O8                | 74.82(18)  | O10—Dy3—N9               | 26.1(2)    | O23 <sup>i</sup> —Dy5—O6 <sup>i</sup> | 135.7(4)   |
| O4—Dy2—N11               | 75.13 (19) | N7—Dy3—O10               | 74.1(2)    | O23—Dy5—O6                            | 135.7(4)   |
| O4—Dy2—N2                | 100.30(18) | N7—Dy3—O12               | 141.1(2)   | O23 <sup>i</sup> —Dy5—N5 <sup>i</sup> | 81.1(4)    |
| O4—Dy2—N10               | 100.79(19) | N7—Dy3—O14               | 75.8(2)    | O23—Dy5—N5                            | 81.1(4)    |
| O7—Dy2—N11               | 141.37(19) | N7—Dy3—N9                | 73.1(2)    | O23—Dy5—N5 <sup>i</sup>               | 72.0(3)    |
| O7—Dy2—N2                | 25.47(17)  | O12—Dy3—N9               | 68.0(3)    | O23 <sup>i</sup> —Dy5—N5              | 72.0(3)    |
| O7—Dy2—N10               | 74.1(2)    | O14—Dy3—O10              | 51.58(19)  | O23—Dy5—O23 <sup>i</sup>              | 148.3(5)   |
| O8—Dy2—O7                | 50.95(17)  | O14—Dy3—O12              | 70.0(2)    | O6—Dy5—O6 <sup>i</sup>                | 71.3(2)    |
| O8—Dy2—N11               | 126.5(2)   | O14—Dy3—N9               | 25.5(2)    | O6—Dy5—N5 <sup>i</sup>                | 126.1(2)   |
| O8—Dy2—N2                | 25.57(18)  | O15—Dy4—O15 <sup>i</sup> | 49.0(3)    | O6 <sup>i</sup> —Dy5—N5               | 126.1(2)   |
| O8—Dy2—N10               | 73.9(2)    | O15 <sup>i</sup> —Dy4—N1 | 24.49(16)  | O6 <sup>i</sup> —Dy5—N5 <sup>i</sup>  | 142.6(2)   |
| O9—Dy2—O1                | 134.78(16) | O15—Dy4—N1               | 24.49(16)  | O6—Dy5—N5                             | 142.6(2)   |

**Table S5.** Selected parameters from the fitting result of the Cole-Cole plots for **3** under 0 Oe fields.

| Frequency (Hz) | $\Delta$ (K) | $\tau_0$ (s)          |
|----------------|--------------|-----------------------|
| 10             | 1.5974       | $2.59 \times 10^{-6}$ |

|     |        |                       |
|-----|--------|-----------------------|
| 100 | 1.5770 | $1.42 \times 10^{-6}$ |
| 499 | 2.3738 | $4.69 \times 10^{-7}$ |
| 700 | 2.0966 | $3.58 \times 10^{-7}$ |
| 999 | 2.2243 | $2.84 \times 10^{-7}$ |

### Note 1

SQUEEZE results for these two compounds are as follows:

#### (1) Dy<sub>16</sub> (1)

Loop\_

```
_platon_squeeze_void_nr
_platon_squeeze_void_average_x
_platon_squeeze_void_average_y
_platon_squeeze_void_average_z
_platon_squeeze_void_volume
_platon_squeeze_void_count_electrons
_platon_squeeze_void_content
```

1 -0.111 -0.152 -0.002 8895 2808"

That is, SQUEEZE gives 2808 electrons/unit cell for the voids, and each formula unit has  $2808/12 = 234$  electrons (since  $Z = 12$ ). It is well known that 1 H<sub>2</sub>O molecule contains 10 electrons, 1 CH<sub>3</sub>CN molecule contains 22 electrons, and a CH<sub>3</sub>OH molecule contains 18 electrons. Further combined with elemental analysis and thermogravimetric analysis results (Figure S5), the molecular formula of **1** is calculated to be:

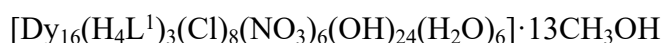

#### (2) Dy<sub>7</sub> (3)

Loop\_

```
_platon_squeeze_void_nr
_platon_squeeze_void_average_x
_platon_squeeze_void_average_y
_platon_squeeze_void_average_z
_platon_squeeze_void_volume
_platon_squeeze_void_count_electrons
_platon_squeeze_void_content
```

```
1 0.250 0.250 0.000 556 135 ''
2 0.750 -0.250 0.000 556 135 ''
3 0.250 -0.250 0.500 555 135 ''
4 0.750 0.250 0.500 555 135 ''
```

That is, SQUEEZE gives 135 electrons/unit cell for the voids, and each formula unit has  $135/1 = 135$  electrons (since  $Z = 1$ ). It is well known that 1 H<sub>2</sub>O molecule contains 10 electrons, 1 CH<sub>3</sub>CN

molecule contains 22 electrons, and a CH<sub>3</sub>OH molecule contains 18 electrons. Further combined with elemental analysis and thermogravimetric analysis results (Figure S5), the molecular formula of **3** is calculated to be:

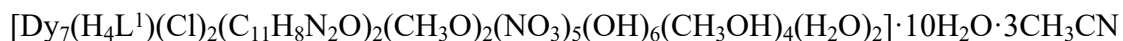

### References:

- [1] Sheldrick, G. M. *Acta Crystallogr., Sect. C: Struct. Chem.* **2015**, *71*, 3-8.
- [2] Luo, Z.-R.; Wang, H.-L.; Zhu, Z.-H.; Liu, T.; Ma, X.-F.; Wang, H.-F.; Zou, H.-H.; Liang, F.-P. Assembly of Dy<sub>60</sub> and Dy<sub>30</sub> Cage-Shaped Nanoclusters. *Commun. Chem.* **2020**, *3*(1), 30. <https://doi.org/10.1038/s42004-020-0276-3>.
